# Supplementary material for: Development of HuMiChip for Functional Profiling of Human Microbiomes
Source: PLoS One. 2014 Mar 4;9(3):e90546. doi: 10.1371/journal.pone.0090546 (PMC3942451; doi:10.1371/journal.pone.0090546)
Supplement: Table S1 — Summary of functional gene categories, families, names, and their involved pathways and probe infromation on HuMiChip. (XLSX) [file pone.0090546.s002.xlsx]

## Sheet: SupplementaryTableNew
Table S1. Summary of functional gene categories, families, names, and their involved pathways and probe infromation on HuMiChip
category	geneID	gene name	pathways	UniqueProbe	GroupProbe	TotalProbe	SeqWithProbe	note
Amino Acid Metabolism	1.1.1.23	Histidinol dehydrogenase	Histidine metabolism	156	95	251	420
Amino Acid Metabolism	1.1.1.3	homoserine dehydrogenase	Glycine, serine and threonine metabolism; Cysteine and methionine metabolism; Lysine biosynthesis	198	109	307	413
Amino Acid Metabolism	1.1.1.85	3-isopropylmalate dehydrogenase	Valine, leucine and isoleucine biosynthesis	151	83	234	394
Amino Acid Metabolism	1.1.1.86	ketol-acid reductoisomerase	Valine, leucine and isoleucine biosynthesis; Pantothenate and CoA biosynthesis	71	32	103	163
Amino Acid Metabolism	1.3.1.12	prephenate dehydrogenase	Phenylalanine, tyrosine and tryptophan biosynthesis; Novobiocin biosynthesis	137	64	201	300
Amino Acid Metabolism	1.3.1.26	dihydrodipicolinate reductase	Lysine biosynthesis	159	97	256	405	This reaction is the second committed step in the biosynthesis of L-lysine and its precursor meso-diaminopimelate, which are critical for both protein and cell wall biosynthesis.
Amino Acid Metabolism	1.4.1.1	L-alanine dehydrogenase	Alanine, aspartate and glutamate metabolism; Taurine and hypotaurine metabolism	74	40	114	218
Amino Acid Metabolism	1.4.1.13	glutamate synthase large and small subunit (NADPH)	Alanine, aspartate and glutamate metabolism; Nitrogen metabolism	477	253	730	811
Amino Acid Metabolism	1.5.1.2	pyrroline-5-carboxylate reductase	Arginine and proline metabolism	184	94	278	416
Amino Acid Metabolism	1.5.99.8	proline dehydrogenase	Arginine and proline metabolism	38	8	46	67	proline degradation
Amino Acid Metabolism	2.1.2.1	serine hydroxymethyltransferase	Glycine, serine and threonine metabolism; Methane metabolism; Cyanoamino acid metabolism; Glyoxylate and dicarboxylate metabolism	158	102	260	424
Amino Acid Metabolism	2.1.3.3	ornithine carbamoyltransferase 1	Arginine and proline metabolism	200	84	284	372	In prokaryotes and eukaryotic microorganisms it is involved in the biosynthesis of arginine. In some bacterial species it is also involved in the degradation of arginine.
Amino Acid Metabolism	2.3.1.1	N-acetylglutamate synthase	Arginine and proline metabolism	178	54	232	312	Key enzyme in TCA cycle (distinctive gene in Geobacter)
Amino Acid Metabolism	2.3.1.16	acetyl-CoA acyltransferase anaerobic	Fatty acid metabolism; Valine, leucine and isoleucine degradation; Fatty acid elongation; alpha-Linolenic acid metabolism; Geraniol degradation; Biosynthesis of unsaturated fatty acids; Benzoate degradation; Ethylbenzene degradation	183	47	230	294
Amino Acid Metabolism	2.3.1.30	serine O-acetyltransferase	Cysteine and methionine metabolism; Sulfur metabolism	264	104	368	463
Amino Acid Metabolism	2.3.3.13	2-isopropylmalate synthase	Valine, leucine and isoleucine biosynthesis; Pyruvate metabolism	206	113	319	409
Amino Acid Metabolism	2.4.2.17	ATP phosphoribosyltransferase	Histidine metabolism	104	54	158	264	Catalyzes the first step in the biosynthesis of histidine in bacteria, fungi and plants
Amino Acid Metabolism	2.5.1.16	Spermidine Synthase	Arginine and proline metabolism; Glutathione metabolism; Cysteine and methionine metabolism; beta-Alanine metabolism	89	29	118	161	Conversion of putrescine and spermidine
Amino Acid Metabolism	2.5.1.47	cysteine synthase A	Cysteine and methionine metabolism; Sulfur metabolism	210	108	318	415
Amino Acid Metabolism	2.5.1.48	cystathionine gamma-synthase	Cysteine and methionine metabolism; Sulfur metabolism; Selenocompound metabolism	421	197	618	768
Amino Acid Metabolism	2.5.1.54	3-deoxy-7-phosphoheptulonate synthase	Phenylalanine, tyrosine and tryptophan biosynthesis	230	109	339	410
Amino Acid Metabolism	2.6.1.42	branched-chain-amino-acid transaminase	Glucosinolate biosynthesis; Valine, leucine and isoleucine degradation; Valine, leucine and isoleucine biosynthesis; Pantothenate and CoA biosynthesis	180	108	288	463
Amino Acid Metabolism	2.6.1.66	valine-pyruvate aminotransferase	Valine, leucine and isoleucine biosynthesis	176	46	222	283
Amino Acid Metabolism	2.7.1.39	homoserine kinase	Glycine, serine and threonine metabolism	112	36	148	200
Amino Acid Metabolism	2.7.1.71	shikimate kinase I II	Phenylalanine, tyrosine and tryptophan biosynthesis	165	70	235	359
Amino Acid Metabolism	2.7.2.11	gamma-glutamyl kinase	Arginine and proline metabolism	163	87	250	392	amino acid kinase family
Amino Acid Metabolism	2.7.2.4	aspartate kinase	Glycine, serine and threonine metabolism; Cysteine and methionine metabolism; Lysine biosynthesis	263	151	414	553
Amino Acid Metabolism	2.7.2.8	acetylglutamate kinase	Arginine and proline metabolism	134	62	196	316
Amino Acid Metabolism	2.8.3.5	Butyryl CoA Acetate CoA Transferase	Synthesis and degradation of ketone bodies; Valine, leucine and isoleucine degradation; Butanoate metabolism	69	20	89	107	Primary pathway for butryate production in gut community
Amino Acid Metabolism	3.5.1.2	L-glutaminase	D-Glutamine and D-glutamate metabolism; Alanine, aspartate and glutamate metabolism; Arginine and proline metabolism; Nitrogen metabolism	69	41	110	175
Amino Acid Metabolism	3.5.3.11	Agamintase	Arginine and proline metabolism	69	22	91	116	Conversion of agmatine and putrescine
Amino Acid Metabolism	3.5.4.1	cytosine deaminase	Arginine and proline metabolism; Pyrimidine metabolism	189	98	287	445
Amino Acid Metabolism	3.5.4.19	phosphoribosyl-AMP cyclohydrolase	Histidine metabolism	72	39	111	190
Amino Acid Metabolism	3.6.1.31	phosphoribosyl-ATP pyrophosphatase	Histidine metabolism	56	26	82	127
Amino Acid Metabolism	4.1.1.15	glutamate decarboxylase A and B PLP-dependent	Taurine and hypotaurine metabolism; Alanine, aspartate and glutamate metabolism; beta-Alanine metabolism; Butanoate metabolism; GABAergic synapse; Type I diabetes mellitus	41	17	58	109
Amino Acid Metabolism	4.1.1.17	Ornithine Decarboxylase	Arginine and proline metabolism; Glutathione metabolism	48	17	65	50	Conversion of ornithine and putrescine
Amino Acid Metabolism	4.1.1.18	lysine decarboxylase 1	Lysine degradation; Tropane, piperidine and pyridine alkaloid biosynthesis	133	44	177	277
Amino Acid Metabolism	4.1.1.19	biosynthetic arginine decarboxylase PLP-binding	Arginine and proline metabolism	127	33	160	186
Amino Acid Metabolism	4.1.1.48	Indole-3-glycerol-phosphate synthase	Phenylalanine, tyrosine and tryptophan biosynthesis	101	51	152	258
Amino Acid Metabolism	4.1.2.14	KDPG Aldolase	Pentose phosphate pathway; Pentose and glucuronate interconversions; Arginine and proline metabolism	112	52	164	242	Diagnostic gene of ED pathway
Amino Acid Metabolism	4.1.2.5	L-threonine aldolase	Glycine, serine and threonine metabolism	137	65	202	334
Amino Acid Metabolism	4.1.3.27	anthranilate synthase	Phenylalanine, tyrosine and tryptophan biosynthesis	219	96	315	418
Amino Acid Metabolism	4.2.1.10	3-dehydroquinate dehydratase	Phenylalanine, tyrosine and tryptophan biosynthesis	127	53	180	254
Amino Acid Metabolism	4.2.1.52	dihydrodipicolinate synthase	Lysine biosynthesis	326	156	482	635
Amino Acid Metabolism	4.2.1.9	dihydroxy-acid dehydratase	Valine, leucine and isoleucine biosynthesis; Pantothenate and CoA biosynthesis	221	129	350	373
Amino Acid Metabolism	4.2.3.1	L-threonine synthase	Glycine, serine and threonine metabolism; Vitamin B6 metabolism	240	104	344	490
Amino Acid Metabolism	4.2.3.5	chorismate synthase	Phenylalanine, tyrosine and tryptophan biosynthesis	222	102	324	529
Amino Acid Metabolism	4.3.1.19	threonine ammonia-lyase	Glycine, serine and threonine metabolism; Valine, leucine and isoleucine biosynthesis	193	87	280	371
Amino Acid Metabolism	4.3.2.1	argininosuccinate lyase	Alanine, aspartate and glutamate metabolism; Arginine and proline metabolism	186	99	285	457
Amino Acid Metabolism	4.4.1.15	D-cysteine desulfhydrase	Cysteine and methionine metabolism	19	3	22	25
Amino Acid Metabolism	5.1.1.13	aspartate racemase	Alanine, aspartate and glutamate metabolism	32	1	33	36
Amino Acid Metabolism	5.1.1.7	Diaminopimelate epimerase	Lysine biosynthesis	185	115	300	500
Amino Acid Metabolism	5.4.99.5	chorismate mutase	Phenylalanine, tyrosine and tryptophan biosynthesis	96	20	116	149
Amino Acid Metabolism	6.3.1.1	aspartate-ammonia ligase	Alanine, aspartate and glutamate metabolism; Cyanoamino acid metabolism; Nitrogen metabolism	110	72	182	321
Amino Acid Metabolism	6.3.1.2	L-glutamine synthase	Alanine, aspartate and glutamate metabolism; Arginine and proline metabolism; Glyoxylate and dicarboxylate metabolism; Nitrogen metabolism	332	162	494	596
Amino Acid Metabolism	6.3.2.13	UDP-N-acetylmuramoyl-L-alanyl-D-glutamatemeso-diaminopimelate ligase	Lysine biosynthesis; Peptidoglycan biosynthesis	677	297	974	1121
Amino Acid Metabolism	6.3.4.4	adenylosuccinate synthetase	Purine metabolism;Alanine, aspartate and glutamate metabolism	203	140	343	598
Amino Acid Metabolism	6.3.4.5	arginosuccinate synthase	Alanine, aspartate and glutamate metabolism;Arginine and proline metabolism	130	79	209	390
Amino Acid Metabolism	6.3.5.5	carbamoyl phosphate synthetase small subunit glutamine amidotransferase	Pyrimidine metabolism; Alanine, aspartate and glutamate metabolism	423	254	677	897
Carbohydrate Metabolism	1.1.1.27	L-Lactate Dehydrogenase	Glycolysis / Gluconeogenesis; Pyruvate metabolism; Propanoate metabolism	174	96	270	433	Catalyzes conversion of lactate and pyruvate
Carbohydrate Metabolism	1.1.2.3	L-Lactate Dehydrogenase (cytochrome)	Pyruvate metabolism	33	8	41	56	Catalyzes conversion of lactate and pyruvate
Carbohydrate Metabolism	2.1.2.1	serine hydroxymethyltransferase	Glycine, serine and threonine metabolism; Methane metabolism; Cyanoamino acid metabolism; Glyoxylate and dicarboxylate metabolism	158	102	260	424
Carbohydrate Metabolism	2.2.1.1	Transketolase	Pentose phosphate pathway; Carbon fixation in photosynthetic organisms; Biosynthesis of ansamycins	492	250	742	887	Diagnostic gene of PPP
Carbohydrate Metabolism	2.2.1.2	Transaldolase	Pentose phosphate pathway	112	52	164	267	Diagnostic gene of PPP
Carbohydrate Metabolism	2.3.1.54	Pyruvate-Formate Lyase	Pyruvate metabolism; Propanoate metabolism; Butanoate metabolism	399	182	581	747	Key anaerobic respiration enzyme in the gut
Carbohydrate Metabolism	2.3.3.1	Si-Citrate Synthase	Citrate cycle (TCA cycle)	186	106	292	407
Carbohydrate Metabolism	2.3.3.13	2-isopropylmalate synthase	Valine, leucine and isoleucine biosynthesis; Pyruvate metabolism	206	113	319	409
Carbohydrate Metabolism	2.4.1.21	Glycogen Synthase	Starch and sucrose metabolism	202	151	353	540	Diagnostic starch metabolism gene
Carbohydrate Metabolism	2.7.1.12	Gluconokinase	Pentose phosphate pathway	35	9	44	37	Diagnostic gene of ED pathway
Carbohydrate Metabolism	2.7.1.15	Ribokinase	Pentose phosphate pathway	399	171	570	604	Phosphorylates ribose for introduction into pentose phosphate pathways
Carbohydrate Metabolism	2.7.1.56	1-Phosphofructokinase	Fructose and mannose metabolism	195	76	271	283	Mediates introduction of fructose-1-phosphate into glycolysis
Carbohydrate Metabolism	2.7.1.6	Galactokinase	Galactose metabolism	151	90	241	389	Terminal step in galactose metabolism
Carbohydrate Metabolism	2.7.2.15	Propionate Kinase	Propanoate metabolism	36	10	46	60	Key step in propionate production
Carbohydrate Metabolism	2.7.2.7	Butyrate Kinase	Butanoate metabolism	102	47	149	185	Secondary pathway for butryate production in gut community
Carbohydrate Metabolism	2.8.3.5	Butyryl CoA Acetate CoA Transferase	Synthesis and degradation of ketone bodies; Valine, leucine and isoleucine degradation; Butanoate metabolism	69	20	89	107	Primary pathway for butryate production in gut community
Carbohydrate Metabolism	3.2.1.15	Pectinase (Pectinesterase)	Pentose and glucuronate interconversions; Starch and sucrose metabolism	24	9	33	44	Converts pectin (poly(1,4-??-D-galacturonide)) to pectate (poly(1,4-??-D-galacturonate))
Carbohydrate Metabolism	3.2.1.20	alpha-Glucosidase	Starch and sucrose metabolism; Galactose metabolism	410	191	601	783	Cleaves sucrose
Carbohydrate Metabolism	3.2.1.23	beta-D-galactosidase	Glycosaminoglycan degradation; Other glycan degradation; Galactose metabolism; Sphingolipid metabolism; Glycosphingolipid biosynthesis - ganglio series	637	430	1067	1070	Cleaves lactose
Carbohydrate Metabolism	3.2.1.31	beta-D-glucuronidase	Glycosaminoglycan degradation; Pentose and glucuronate interconversions; Starch and sucrose metabolism; Porphyrin and chlorophyll metabolism; Flavone and flavonol biosynthesis; Lysosome	303	106	409	435	Cancer marker
Carbohydrate Metabolism	3.2.1.52	beta-N-acetyl-D-hexosaminide N-acetylhexosaminohydrolase	Glycosaminoglycan degradation; Other glycan degradation; Amino sugar and nucleotide sugar metabolism; Glycosphingolipid biosynthesis - globo series; Glycosphingolipid biosynthesis - ganglio series; Various types of N-glycan biosynthesis	332	198	530	712
Carbohydrate Metabolism	3.2.1.67	Extracellular Exopectate Hydrolase	Pentose and glucuronate interconversions; Starch and sucrose metabolism	40	16	56	74
Carbohydrate Metabolism	3.2.1.91	Cellulase (Exoglucanase)	Starch and sucrose metabolism	7	0	7	13	Converts cellulose to cellobioase
Carbohydrate Metabolism	3.5.1.25	N-Acetylglucosamine-6-Phosphate Deacetylase	Amino sugar and nucleotide sugar metabolism; Galactose metabolism	338	109	447	522	Diagnostic gene for introduction of GlcNAc and GalNAc into glycolysis
Carbohydrate Metabolism	4.1.1.15	glutamate decarboxylase A and B PLP-dependent	Taurine and hypotaurine metabolism; Alanine, aspartate and glutamate metabolism; beta-Alanine metabolism; Butanoate metabolism; GABAergic synapse; Type I diabetes mellitus	41	17	58	109
Carbohydrate Metabolism	4.1.1.41	Methylmalonyl-CaA decarboxylase	Propanoate metabolism	212	108	320	428	Key step in propionate production
Carbohydrate Metabolism	4.1.2.14	KDPG Aldolase	Pentose phosphate pathway; Pentose and glucuronate interconversions; Arginine and proline metabolism	112	52	164	242	Diagnostic gene of ED pathway
Carbohydrate Metabolism	4.2.1.12	Phosphogluconate dehydratase	Pentose phosphate pathway	52	2	54	66	Diagnostic gene of ED pathway
Carbohydrate Metabolism	4.2.2.2	Extracellular Endopectate Lyase	Pentose and glucuronate interconversions	20	1	21	21
Carbohydrate Metabolism	5.3.1.12	Glucuronate Isomerase	Pentose and glucuronate interconversions	93	74	167	281	Initial step for interconversion of glucuronate for introduction into pentose phosphate pathway
Carbohydrate Metabolism	5.3.1.25	Fucose Isomerase	Fructose and mannose metabolism	64	37	101	193
Carbohydrate Metabolism	5.3.1.4	Arabinose Isomerase	Pentose and glucuronate interconversions	66	39	105	184	Conversion of arabinose to ribulose for introduction into pentose phosphate pathway
Carbohydrate Metabolism	5.3.1.5	Xylose Isomerase	Pentose and glucuronate interconversions; Fructose and mannose metabolism	57	35	92	156	Initial step for introducing xylose into pentose phosphate pathway
Carbohydrate Metabolism	5.3.1.8	Mannose-6-Phosphate Isomerase	Fructose and mannose metabolism; Amino sugar and nucleotide sugar metabolism	147	81	228	345	Mediates introduction of mannose-6-phosphate into glycolysis
Carbohydrate Metabolism	6.3.1.2	L-glutamine synthase	Alanine, aspartate and glutamate metabolism; Arginine and proline metabolism; Glyoxylate and dicarboxylate metabolism; Nitrogen metabolism	332	162	494	596
Energy Metabolism	1.2.99.2	Carbon Monoxide Dehydrogenase	Methane metabolism; Nitrotoluene degradation; Carbon fixation pathways in prokaryotes	128	8	136	147	Terminal step in acetogenesis
Energy Metabolism	1.4.1.13	glutamate synthase large and small subunit (NADPH)	Alanine, aspartate and glutamate metabolism; Nitrogen metabolism	477	253	730	811
Energy Metabolism	2.1.2.1	serine hydroxymethyltransferase	Glycine, serine and threonine metabolism; Methane metabolism; Cyanoamino acid metabolism; Glyoxylate and dicarboxylate metabolism	158	102	260	424
Energy Metabolism	2.2.1.1	Transketolase	Pentose phosphate pathway; Carbon fixation in photosynthetic organisms; Biosynthesis of ansamycins	492	250	742	887	Diagnostic gene of PPP
Energy Metabolism	2.3.1.30	serine O-acetyltransferase	Cysteine and methionine metabolism; Sulfur metabolism	264	104	368	463
Energy Metabolism	2.5.1.47	cysteine synthase A	Cysteine and methionine metabolism; Sulfur metabolism	210	108	318	415
Energy Metabolism	2.5.1.48	cystathionine gamma-synthase	Cysteine and methionine metabolism; Sulfur metabolism; Selenocompound metabolism	421	197	618	768
Energy Metabolism	2.7.2.1	Acetate Kinase	Taurine and hypotaurine metabolism; Methane metabolism; Carbon fixation pathways in prokaryotes	113	113	226	114	Diagnostic enzyme for acetate production
Energy Metabolism	2.7.7.4	sulfate adenylyltransferase subunit 2	Selenocompound metabolism; Sulfur metabolism	97	59	156	293
Energy Metabolism	3.5.1.1	asparaginase	Cyanoamino acid metabolism; Nitrogen metabolism	209	92	301	463
Energy Metabolism	3.5.1.2	L-glutaminase	D-Glutamine and D-glutamate metabolism; Alanine, aspartate and glutamate metabolism; Arginine and proline metabolism; Nitrogen metabolism	69	41	110	175
Energy Metabolism	6.3.1.1	aspartate-ammonia ligase	Alanine, aspartate and glutamate metabolism; Cyanoamino acid metabolism; Nitrogen metabolism	110	72	182	321
Energy Metabolism	6.3.1.2	L-glutamine synthase	Alanine, aspartate and glutamate metabolism; Arginine and proline metabolism; Glyoxylate and dicarboxylate metabolism; Nitrogen metabolism	332	162	494	596
Energy Metabolism	6.3.4.3	Formyltetrahydrofolate synthetase	One carbon pool by folate; Carbon fixation pathways in prokaryotes	212	139	351	482	Formylates THF
Glycan Biosynthesis and Metabolism	2.3.1.129	UDP-N-acetylglucosamine acyltransferase	Lipopolysaccharide biosynthesis	202	108	310	377	form amino sugars
Glycan Biosynthesis and Metabolism	2.7.8.13	phospho-N-acetylmuramoyl-pentapeptide transferase	Peptidoglycan biosynthesis	205	110	315	497	Peptidoglycan biosynthesis
Glycan Biosynthesis and Metabolism	3.1.6.12	N-acetyl-D-galactosamine-4-sulfate 4-sulfohydrolase	Glycosaminoglycan degradation	305	172	477	605
Glycan Biosynthesis and Metabolism	3.1.6.14	N-acetyl-D-glucosamine-6-sulfate 6-sulfohydrolase	Glycosaminoglycan degradation	105	28	133	173
Glycan Biosynthesis and Metabolism	3.2.1.23	beta-D-galactosidase	Glycosaminoglycan degradation; Other glycan degradation; Galactose metabolism; Sphingolipid metabolism; Glycosphingolipid biosynthesis - ganglio series	637	430	1067	1070	Cleaves lactose
Glycan Biosynthesis and Metabolism	3.2.1.24	alpha-mannosidase	Other glycan degradation	173	97	270	405
Glycan Biosynthesis and Metabolism	3.2.1.25	Mannanase (beta-mannosidase)	Other glycan degradation; Lysosome	113	86	199	302	Converts mannan (polymannose) to mannose monomers
Glycan Biosynthesis and Metabolism	3.2.1.31	beta-D-glucuronidase	Glycosaminoglycan degradation; Pentose and glucuronate interconversions; Starch and sucrose metabolism; Porphyrin and chlorophyll metabolism; Flavone and flavonol biosynthesis; Lysosome	303	106	409	435	Cancer marker
Glycan Biosynthesis and Metabolism	3.2.1.52	beta-N-acetyl-D-hexosaminide N-acetylhexosaminohydrolase	Glycosaminoglycan degradation; Other glycan degradation; Amino sugar and nucleotide sugar metabolism; Glycosphingolipid biosynthesis - globo series; Glycosphingolipid biosynthesis - ganglio series; Various types of N-glycan biosynthesis	332	198	530	712
Glycan Biosynthesis and Metabolism	5.1.3.20	ADP-L-glycero-D-mannoheptose-6-epimerase NAD(P)-binding	Lipopolysaccharide biosynthesis	45	7	52	62	form sedoheptulose 7-P
Glycan Biosynthesis and Metabolism	6.3.2.13	UDP-N-acetylmuramoyl-L-alanyl-D-glutamatemeso-diaminopimelate ligase	Lysine biosynthesis; Peptidoglycan biosynthesis	677	297	974	1121	Lysine biosynthesis, Peptidoglycan biosynthesis
Glycan Biosynthesis and Metabolism	6.3.2.4	D-alanineD-alanine ligase	D-Alanine metabolism; Peptidoglycan biosynthesis	255	120	375	565	D-Alanine metabolism, Peptidoglycan biosynthesis
Glycan Biosynthesis and Metabolism	6.3.2.8	UDP-N-acetylmuramateL-alanine ligase	D-Glutamine and D-glutamate metabolism; Peptidoglycan biosynthesis	515	187	702	809	D-Glutamine and D-glutamate metabolism, Peptidoglycan biosynthesis
Glycan Biosynthesis and Metabolism	6.3.2.9	UDP-N-acetylmuramoyl-L-alanineD-glutamate ligase	D-Glutamine and D-glutamate metabolism; Peptidoglycan biosynthesis	512	182	694	778	D-Glutamine and D-glutamate metabolism, Peptidoglycan biosynthesis
Lipid Metabolism	2.3.1.16	acetyl-CoA acyltransferase anaerobic	Fatty acid metabolism; Valine, leucine and isoleucine degradation; Fatty acid elongation; alpha-Linolenic acid metabolism; Geraniol degradation; Biosynthesis of unsaturated fatty acids; Benzoate degradation; Ethylbenzene degradation	183	47	230	294
Lipid Metabolism	2.3.1.180	beta-ketoacyl-acyl-carrier-protein synthase III	Fatty acid biosynthesis	220	122	342	545
Lipid Metabolism	2.7.1.30	Glycerol Kinase	Glycerolipid metabolism; PPAR signaling pathway; Plant-pathogen interaction	331	128	459	530
Lipid Metabolism	2.8.3.5	Butyryl CoA Acetate CoA Transferase	Synthesis and degradation of ketone bodies; Valine, leucine and isoleucine degradation; Butanoate metabolism	69	20	89	107	Primary pathway for butryate production in gut community
Lipid Metabolism	3.2.1.23	beta-D-galactosidase	Glycosaminoglycan degradation; Other glycan degradation; Galactose metabolism; Sphingolipid metabolism; Glycosphingolipid biosynthesis - ganglio series	637	430	1067	1070	Cleaves lactose
Lipid Metabolism	3.5.1.24	Conjugated Bile Salt Hydrolase	Primary bile acid biosynthesis; Secondary bile acid biosynthesis	145	83	228	359	Metabolizes conjugated bile salts in the gut
Metabolism of Cofactors and Vitamins	1.1.1.86	ketol-acid reductoisomerase	Valine, leucine and isoleucine biosynthesis; Pantothenate and CoA biosynthesis	71	32	103	163
Metabolism of Cofactors and Vitamins	2.1.1.64	3-demethylubiquinone-9 3-methyltransferase	Ubiquinone and other terpenoid-quinone biosynthesis	152	26	178	216	Terminal step in ubiquinone biosynthesis
Metabolism of Cofactors and Vitamins	2.5.1.9	Riboflavin Synthase ?? Subunit	Riboflavin metabolism	97	44	141	206	Terminal step in riboflavin biosynthesis
Metabolism of Cofactors and Vitamins	2.6.1.42	branched-chain-amino-acid transaminase	Glucosinolate biosynthesis; Valine, leucine and isoleucine degradation; Valine, leucine and isoleucine biosynthesis; Pantothenate and CoA biosynthesis	180	108	288	463
Metabolism of Cofactors and Vitamins	2.7.1.35	Pyridoxal Kinase	Vitamin B6 metabolism	192	93	285	336	Catalyzes formation of pyridoxal-5-phosphate
Metabolism of Cofactors and Vitamins	2.7.1.89	Thiamin Kinase	Thiamine metabolism	6	0	6	7	Terminal step in thiamine biosynthesis
Metabolism of Cofactors and Vitamins	2.7.8.26	Cobalamin Synthase	Porphyrin and chlorophyll metabolism	77	23	100	141	Terminal step in Vitamin B12 biosynthesis
Metabolism of Cofactors and Vitamins	2.8.1.6	Biotin Synthase	Biotin metabolism	131	69	200	241	Catalyzes formation of biotin from dethiobiotin
Metabolism of Cofactors and Vitamins	3.2.1.31	beta-D-glucuronidase	Glycosaminoglycan degradation; Pentose and glucuronate interconversions; Starch and sucrose metabolism; Porphyrin and chlorophyll metabolism; Flavone and flavonol biosynthesis; Lysosome	303	106	409	435	Cancer marker
Metabolism of Cofactors and Vitamins	4.2.1.9	dihydroxy-acid dehydratase	Valine, leucine and isoleucine biosynthesis; Pantothenate and CoA biosynthesis	221	129	350	373
Metabolism of Cofactors and Vitamins	4.2.3.1	L-threonine synthase	Glycine, serine and threonine metabolism; Vitamin B6 metabolism	240	104	344	490
Metabolism of Cofactors and Vitamins	4.99.1.1	Ferrochetalase	Porphyrin and chlorophyll metabolism	68	16	84	105	Terminal step in heme formation
Metabolism of Cofactors and Vitamins	4.99.1.3	Cobalt Chelatase	Porphyrin and chlorophyll metabolism	74	45	119	204	Incorporates colbalt into precorrin molecule
Metabolism of Cofactors and Vitamins	6.3.2.1	Pantothenate Synthetase	beta-Alanine metabolism; Pantothenate and CoA biosynthesis	82	51	133	236	Catalyzes formation of pantothenate for further conversion to CoA
Metabolism of Cofactors and Vitamins	6.3.2.17	Folylpolyglutamate Synthase	Folate biosynthesis	271	126	397	466	Catalyzes production of 7,8-dihydrofolate for introduction into the one-carbon pool
Metabolism of Cofactors and Vitamins	6.3.4.3	Formyltetrahydrofolate synthetase	One carbon pool by folate; Carbon fixation pathways in prokaryotes	212	139	351	482	Formylates THF
Metabolism of Cofactors and Vitamins	K03517	Quinolinate Synthase	Nicotinate and nicotinamide metabolism	87	85	172	315	Catalyzes formation of quinolinate for further conversion to NAD
Metabolism of Other Amino Acids	1.4.1.1	L-alanine dehydrogenase	Alanine, aspartate and glutamate metabolism; Taurine and hypotaurine metabolism	74	40	114	218
Metabolism of Other Amino Acids	1.8.1.9	thioredoxin reductase FAD-NADP-binding	Pyrimidine metabolism; Selenocompound metabolism	467	131	598	762
Metabolism of Other Amino Acids	2.1.2.1	serine hydroxymethyltransferase	Glycine, serine and threonine metabolism; Methane metabolism; Cyanoamino acid metabolism; Glyoxylate and dicarboxylate metabolism	158	102	260	424
Metabolism of Other Amino Acids	2.5.1.16	Spermidine Synthase	Arginine and proline metabolism; Glutathione metabolism; Cysteine and methionine metabolism; beta-Alanine metabolism	89	29	118	161	Conversion of putrescine and spermidine
Metabolism of Other Amino Acids	2.5.1.48	cystathionine gamma-synthase	Cysteine and methionine metabolism; Sulfur metabolism; Selenocompound metabolism	421	197	618	768
Metabolism of Other Amino Acids	2.7.2.1	Acetate Kinase	Taurine and hypotaurine metabolism; Methane metabolism; Carbon fixation pathways in prokaryotes	113	113	226	114	Diagnostic enzyme for acetate production
Metabolism of Other Amino Acids	2.7.7.4	sulfate adenylyltransferase subunit 2	Selenocompound metabolism; Sulfur metabolism	97	59	156	293
Metabolism of Other Amino Acids	2.9.1.1	L-Seryl-tRNASec selenium transferase	Selenocompound metabolism; Aminoacyl-tRNA biosynthesis	65	21	86	112
Metabolism of Other Amino Acids	3.5.1.1	asparaginase	Cyanoamino acid metabolism; Nitrogen metabolism	209	92	301	463
Metabolism of Other Amino Acids	3.5.1.2	L-glutaminase	D-Glutamine and D-glutamate metabolism; Alanine, aspartate and glutamate metabolism; Arginine and proline metabolism; Nitrogen metabolism	69	41	110	175
Metabolism of Other Amino Acids	4.1.1.15	glutamate decarboxylase A and B PLP-dependent	Taurine and hypotaurine metabolism; Alanine, aspartate and glutamate metabolism; beta-Alanine metabolism; Butanoate metabolism; GABAergic synapse; Type I diabetes mellitus	41	17	58	109
Metabolism of Other Amino Acids	4.1.1.17	Ornithine Decarboxylase	Arginine and proline metabolism; Glutathione metabolism	48	17	65	50	Conversion of ornithine and putrescine
Metabolism of Other Amino Acids	4.4.1.16	selenocysteine lyase PLP-dependent	Selenocompound metabolism	142	30	172	186
Metabolism of Other Amino Acids	5.1.1.1	alanine racemase	D-Alanine metabolism	626	157	783	840
Metabolism of Other Amino Acids	5.1.1.3	glutamate racemase	D-Glutamine and D-glutamate metabolism	190	105	295	503
Metabolism of Other Amino Acids	6.1.1.10	methionyl-tRNA synthetase	Selenocompound metabolism; Aminoacyl-tRNA biosynthesis	55	62	117	259
Metabolism of Other Amino Acids	6.3.1.1	aspartate-ammonia ligase	Alanine, aspartate and glutamate metabolism; Cyanoamino acid metabolism; Nitrogen metabolism	110	72	182	321
Metabolism of Other Amino Acids	6.3.1.8	glutathionylspermidine synthase	Glutathione metabolism	33	2	35	35	Glutathionylspermidine Metabolism in Escherichia coli J. Martin BollingerJr. Et al. 1995. JBC.270(23)14031-14041
Metabolism of Other Amino Acids	6.3.2.1	Pantothenate Synthetase	beta-Alanine metabolism; Pantothenate and CoA biosynthesis	82	51	133	236	Catalyzes formation of pantothenate for further conversion to CoA
Metabolism of Other Amino Acids	6.3.2.3	glutathione synthase	Glutathione metabolism	17	2	19	22
Metabolism of Other Amino Acids	6.3.2.4	D-alanineD-alanine ligase	D-Alanine metabolism; Peptidoglycan biosynthesis	255	120	375	565	D-Alanine metabolism, Peptidoglycan biosynthesis
Metabolism of Other Amino Acids	6.3.2.8	UDP-N-acetylmuramateL-alanine ligase	D-Glutamine and D-glutamate metabolism; Peptidoglycan biosynthesis	515	187	702	809	D-Glutamine and D-glutamate metabolism, Peptidoglycan biosynthesis
Metabolism of Other Amino Acids	6.3.2.9	UDP-N-acetylmuramoyl-L-alanineD-glutamate ligase	D-Glutamine and D-glutamate metabolism; Peptidoglycan biosynthesis	512	182	694	778	D-Glutamine and D-glutamate metabolism, Peptidoglycan biosynthesis
Metabolism of Terpenoids and Polyketides	1.17.1.2	1-hydroxy-2-methyl-2-E-butenyl 4-diphosphate reductase 4Fe-4S protein	Terpenoid backbone biosynthesis	151	89	240	359
Metabolism of Terpenoids and Polyketides	2.2.1.1	Transketolase	Pentose phosphate pathway; Carbon fixation in photosynthetic organisms; Biosynthesis of ansamycins	492	250	742	887	Diagnostic gene of PPP
Metabolism of Terpenoids and Polyketides	2.3.1.16	acetyl-CoA acyltransferase anaerobic	Fatty acid metabolism; Valine, leucine and isoleucine degradation; Fatty acid elongation; alpha-Linolenic acid metabolism; Geraniol degradation; Biosynthesis of unsaturated fatty acids; Benzoate degradation; Ethylbenzene degradation	183	47	230	294
Metabolism of Terpenoids and Polyketides	2.5.1.10	geranyltranstransferase	Terpenoid backbone biosynthesis	184	81	265	412
Metabolism of Terpenoids and Polyketides	2.7.7.60	4-diphosphocytidyl-2C-methyl-D-erythritol synthase	Terpenoid backbone biosynthesis	237	127	364	565
Nucleotide Metabolism	1.1.1.205	IMP dehydrogenase	Purine metabolism	232	123	355	566
Nucleotide Metabolism	1.17.4.2	anaerobic ribonucleoside-triphosphate reductase	Purine metabolism; Pyrimidine metabolism	378	173	551	704
Nucleotide Metabolism	1.8.1.9	thioredoxin reductase FAD-NADP-binding	Pyrimidine metabolism; Selenocompound metabolism	467	131	598	762
Nucleotide Metabolism	2.4.2.1	purine-nucleoside phosphorylase	Purine metabolism	177	86	263	414
Nucleotide Metabolism	2.4.2.3	uridine phosphorylase	Pyrimidine metabolism	161	73	234	293
Nucleotide Metabolism	2.4.2.4	thymidine phosphorylase	Pyrimidine metabolism	116	49	165	228
Nucleotide Metabolism	2.7.4.14	cytidylate kinase	Pyrimidine metabolism	171	70	241	385
Nucleotide Metabolism	3.5.4.1	cytosine deaminase	Arginine and proline metabolism; Pyrimidine metabolism	189	98	287	445
Nucleotide Metabolism	3.6.1.13	ADP-ribose pyrophosphatase	Purine metabolism	146	47	193	299
Nucleotide Metabolism	4.1.1.23	orotidine-5-phosphate decarboxylase	Pyrimidine metabolism	143	73	216	328
Nucleotide Metabolism	6.3.4.13	phosphoribosylglycinamide synthetase phosphoribosylamine-glycine ligase	Purine metabolism	207	107	314	502
Nucleotide Metabolism	6.3.4.4	adenylosuccinate synthetase	Purine metabolism;Alanine, aspartate and glutamate metabolism	203	140	343	598
Nucleotide Metabolism	6.3.5.5	carbamoyl phosphate synthetase small subunit glutamine amidotransferase	Pyrimidine metabolism; Alanine, aspartate and glutamate metabolism	423	254	677	897
Translation	2.9.1.1	L-Seryl-tRNASec selenium transferase	Selenocompound metabolism; Aminoacyl-tRNA biosynthesis	65	21	86	112
Translation	6.1.1.10	methionyl-tRNA synthetase	Selenocompound metabolism; Aminoacyl-tRNA biosynthesis	55	62	117	259
Translation	6.1.1.11	Serine-tRNA ligase	Aminoacyl-tRNA biosynthesis	150	76	226	394
