# Supplementary material for: Development of HuMiChip for Functional Profiling of Human Microbiomes
Source: PLoS One. 2014 Mar 4;9(3):e90546. doi: 10.1371/journal.pone.0090546 (PMC3942451; doi:10.1371/journal.pone.0090546)
Supplement: Table S2 — Gene families selected for non-standard amino acids metabolism. (XLSX) [file pone.0090546.s003.xlsx]

## Sheet: Sheet1
Table S2. Gene families selected for non-standard amino acids metabolism.
EC Number	gene name	pathway (metabolism of other amino acids)	involved nonstandard amino acids
6.3.2.1	Pantothenate Synthetase	beta-Alanine metabolism; Pantothenate and CoA biosynthesis	Catalyzes formation of pantothenate from beta-alanine
2.1.2.1	serine hydroxymethyltransferase	Cyanoamino acid metabolism	Conversion of serine and glycine for further cyanide production
3.5.1.1	asparaginase	Cyanoamino acid metabolism;	Conversion of L-asparagine to L-aspartate in cyanoamino acid metabolism
6.3.1.1	aspartate-ammonia ligase	Cyanoamino acid metabolism;	Conversion of L-aspartate to L-asparagine in cyanoamino acid metabolism
5.1.1.1	alanine racemase	D-Alanine metabolism	Conversion of L-alanine and D-alanine
6.3.2.4	D-alanineD-alanine ligase	D-Alanine metabolism;	Conversion of D-alanine and D-alanyl-D-alanine
5.1.1.3	glutamate racemase	D-Glutamine and D-glutamate metabolism	Conversion of L-glutamate and D-glutamate
3.5.1.2	L-glutaminase	D-Glutamine and D-glutamate metabolism;	Conversion of D-glutamine and D-glutamate
6.3.2.8	UDP-N-acetylmuramateL-alanine ligase	D-Glutamine and D-glutamate metabolism;	Conversion of UDP-N-acetyl-muramate to UDP-MurNAc-L-Ala
6.3.2.9	UDP-N-acetylmuramoyl-L-alanineD-glutamate ligase	D-Glutamine and D-glutamate metabolism;	Synthesize UDP-MurNAc-L-Ala-D-Glu from D-Glutamate
4.1.1.17	Ornithine Decarboxylase	Glutathione metabolism	Conversion of ornithine and putrescine
6.3.1.8	glutathionylspermidine synthase	Glutathione metabolism	Glutathionyl-spermidine Metabolism
2.5.1.16	Spermidine Synthase	Glutathione metabolism; beta-Alanine metabolism	Conversion of putrescine and spermidine
2.5.1.48	cystathionine gamma-synthase	Selenocompound metabolism	Conversion of selenocysteine and seleno-cystathione
1.8.1.9	thioredoxin reductase FAD-NADP-binding	Selenocompound metabolism	Conversion of selenite to hydrogen selenide
4.4.1.16	selenocysteine lyase PLP-dependent	Selenocompound metabolism	Conversion of selenocystein and hydrogen selenide
2.7.7.4	sulfate adenylyltransferase subunit 2	Selenocompound metabolism;	Conversion of selenate to adenosine 5'-phosphoselenate
2.9.1.1	L-Seryl-tRNASec selenium transferase	Selenocompound metabolism;	Conversion of selenophosphate to L-seleno-cysteinyl-tRNA
6.1.1.10	methionyl-tRNA synthetase	Selenocompound metabolism;	Conversion of selenomethionine to seleno-methionyl-tRNA
1.4.1.1	L-alanine dehydrogenase	Taurine and hypotaurine metabolism	Conversion of L-alanine and pyravate
2.7.2.1	Acetate Kinase	Taurine and hypotaurine metabolism;	Diagnostic enzyme for acetate production
4.1.1.15	glutamate decarboxylase A and B PLP-dependent	Taurine and hypotaurine metabolism; beta-Alanine metabolism;	Key step for taurine production from L-cysteate
